# Supplementary material
Source: PubMed Central journal article supplement (PMC4579434)
Supplement: AEM.01742-15_zam999116655so1.pdf [file AEM.01742-15_zam999116655so1.pdf]

1 **SUPPLEMENTAL FIGURE LEGENDS**

2 Fig. S1. Amino acid sequence alignment and identity of RstAs. Identity indicated the results of  
3 comparison to RstA1 of strain V06-18.

4 Fig. S2. Amino acid sequence alignment and identity of RstBs. Identity indicated the results of  
5 comparison to RstB1 of strain V06-18.

6 Fig. S3. Amino acid sequence alignment and identity of RstRs. Identity indicated the results of  
7 comparison to RstR1 of strain V06-18.

8 Fig. S4. Amino acid sequence alignment and identity of RstCs. Identity indicated the results of  
9 comparison to RstC of strain V06-18.

10

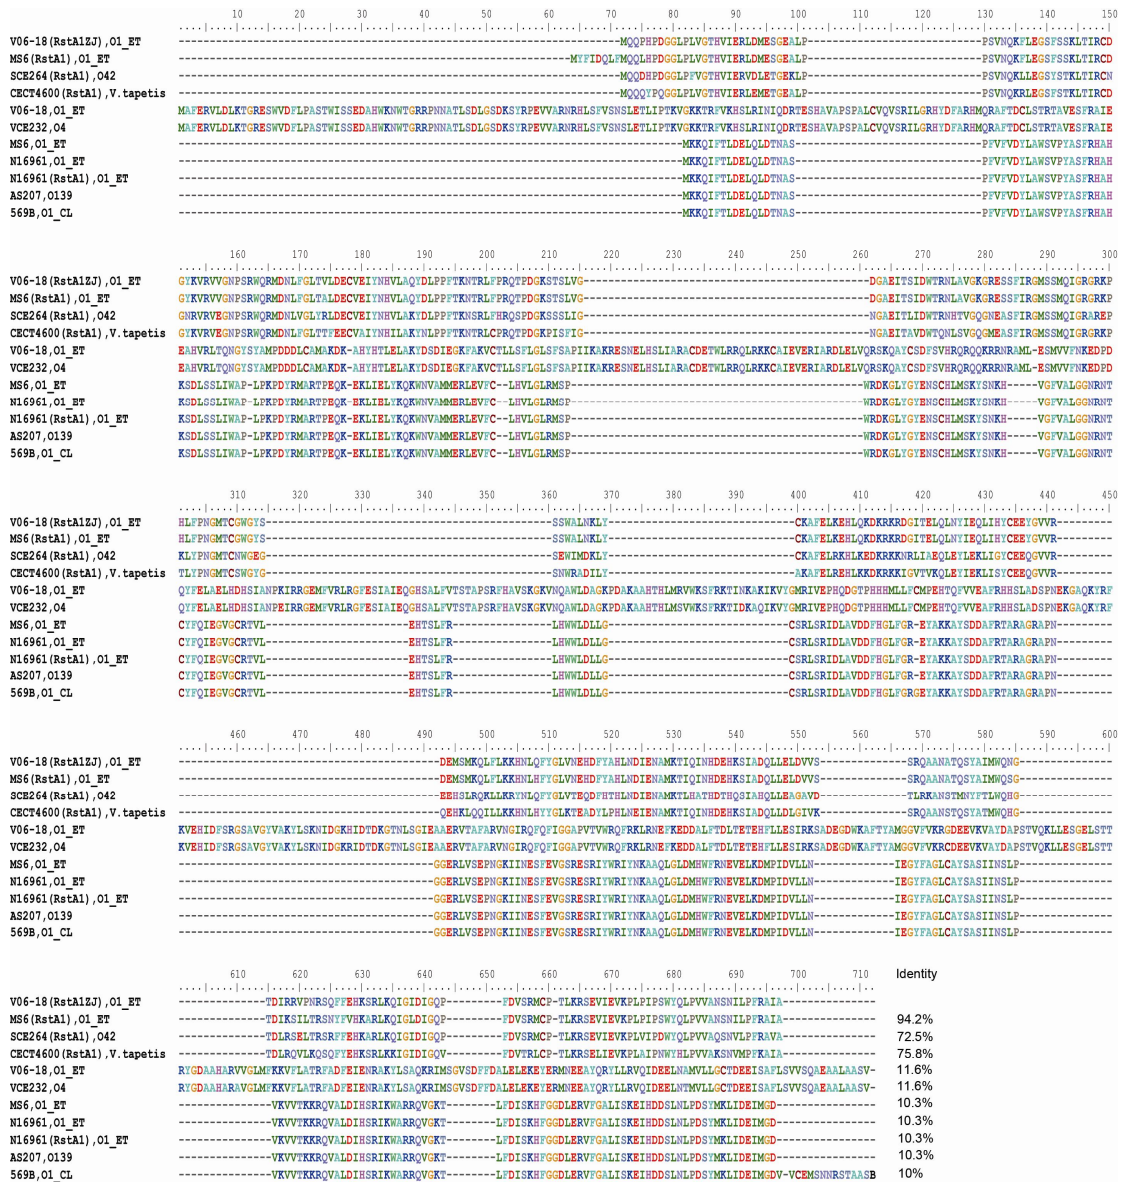

Fig. S1. Amino acid sequence alignment and identity of RstAs. Identity indicated the results of comparison to RstA1 of strain V06-18.

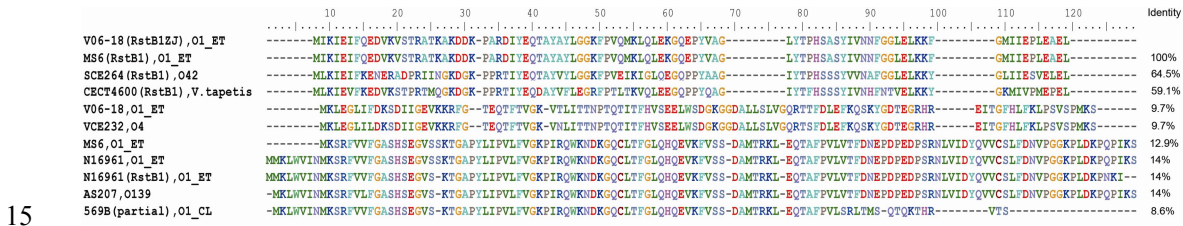

15  
 16 Fig. S2. Amino acid sequence alignment and identity of RstBs. Identity indicated the results of  
 17 comparison to RstB1 of strain V06-18.

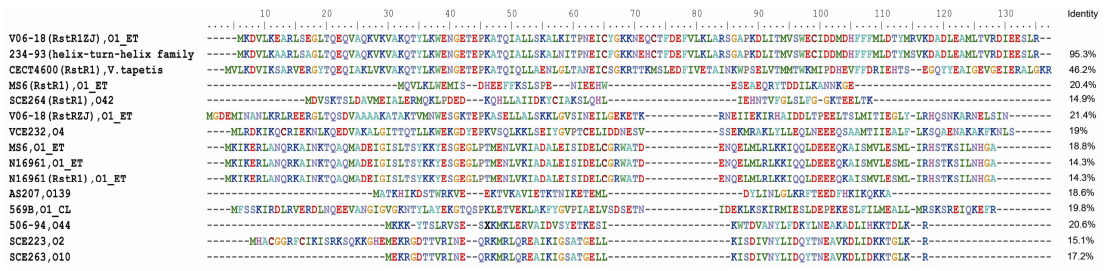

18

19 Fig. S3. Amino acid sequence alignment and identity of RstRs. Identity indicated the results of  
 20 comparison to RstR1 of strain V06-18.

|                    | 10      | 20       | 30      | 40     | 50     | 60     | 70     | Identity  |
|--------------------|---------|----------|---------|--------|--------|--------|--------|-----------|
| V06-18_01_ET       | MSLKPYT | LM DVYDS | LEDLNNM | AVLRS  | GAYTDE | IAHQVQ | NLICDK | II DLQGMV |
| MS6_01_ET          | MSLKPYT | LM DVYDS | LEDLNNM | AVLRS  | GAYTDE | IAHQVQ | NLICDK | II DLQGMV |
| SCE264_042         | MSLKPYT | LM DVYDS | LEDLNNM | AVLRS  | GAYTDE | IAHQVQ | NLICDK | II DLQGMV |
| N16961_01_ET       | MSLKPYT | LM DVYDS | LEDLNNM | AVLRS  | GAYTDE | IAHQVQ | NLICDK | II DLQGMV |
| E7946_01_ET        | MSLKPYT | LM DVYDS | LEDLNNM | AVLRS  | GAYTDE | IAHQVQ | NLICDK | II DLQGMV |
| V44_01_ET          | MSLKPYT | LM DVYDS | LEDLNNM | AVLRS  | GAYTDE | IAHQVQ | NLICDK | II DLQGMV |
| V52_037            | MSLKPYT | LM DVYDS | LEDLNNM | AVLRS  | GAYTDE | IAHQVQ | NLICDK | II DLQGMV |
| V51_0141           | MSLKPYT | LM DVYDS | LEDLNNM | AVLRS  | GAYTDE | IAHQVQ | NLICDK | II DLQGMV |
| CRIS101_01_ET      | MSLKPYT | LM DVYDS | LEDLNNM | AVLRS  | GAYTDE | IAHQVQ | NLICDK | II DLQGMV |
| INDRE91_1_01_ET    | MSLKPYT | LM DVYDS | LEDLNNM | AVLRS  | GAYTDE | IAHQVQ | NLICDK | II DLQGMV |
| IB1627_01_ET       | MSLKPYT | LM DVYDS | LEDLNNM | AVLRS  | GAYTDE | IAHQVQ | NLICDK | II DLQGMV |
| IB1346_01_ET       | MSLKPYT | LM DVYDS | LEDLNNM | AVLRS  | GAYTDE | IAHQVQ | NLICDK | II DLQGMV |
| E1781_01_ET        | MSLKPYT | LM DVYDS | LEDLNNM | AVLRS  | GAYTDE | IAHQVQ | NLICDK | II DLQGMV |
| IB4642_01_ET       | MSLKPYT | LM DVYDS | LEDLNNM | AVLRS  | GAYTDE | IAHQVQ | NLICDK | II DLQGMV |
| VC106_01_ET        | MSLKPYT | LM DVYDS | LEDLNNM | AVLRS  | GAYTDE | IAHQVQ | NLICDK | II DLQGMV |
| KMN002_01_ET       | MSLKPYT | LM DVYDS | LEDLNNM | AVLRS  | GAYTDE | IAHQVQ | NLICDK | II DLQGMV |
| MG116926_01_ET     | MSLKPYT | LM DVYDS | LEDLNNM | AVLRS  | GAYTDE | IAHQVQ | NLICDK | II DLQGMV |
| 01_07vp_01_ET      | MSLKPYT | LM DVYDS | LEDLNNM | AVLRS  | GAYTDE | IAHQVQ | NLICDK | II DLQGMV |
| IB4322_01_ET       | MSLKPYT | LM DVYDS | LEDLNNM | AVLRS  | GAYTDE | IAHQVQ | NLICDK | II DLQGMV |
| CECT4600_V_tapetis | MTVKE   | YTLSDA   | EAKLDT  | IASISL | FLSTG  | NCPRE  | IAENLQ | DHMQDE    |

22

23 Fig. S4. Amino acid sequence alignment and identity of RstCs. Identity indicated the results of  
 24 comparison to RstC of strain V06-18.

25

26

27

28

29

30 **Table S1. Primers.**

| Primers  | Primer sequence (5'–3')           | Target                                              |
|----------|-----------------------------------|-----------------------------------------------------|
| zot1     | AAACCTTGAACGCATGGC                | <i>zot</i>                                          |
| zot2     | GCCCATAGACCACGATAA                |                                                     |
| orfU1    | TCTCCATCGGTAACGGCTTC              | <i>gIII<sup>CTX</sup></i>                           |
| orfU2    | GTTGTAACCAAACGCCTCGAC             |                                                     |
| rstC1    | GATGGCTCAGTCAATGCCTT              | <i>rstC</i>                                         |
| rstC2    | TATATCTGCGTTCAGGCGCTTA            |                                                     |
| inA      | TCCTCCTTGCTTAATCTTG               | VC1479                                              |
| inB      | ATGTGGACAGCTTTGTGGTG              | <i>rtxA</i>                                         |
| InI      | GTCGCCATTGAATCTCTTCC              | VCA0568                                             |
| InJ      | TGGATGTGGTGGAGCTGTAA              | VCA0570                                             |
| RstRZJF  | GGTAAAACTTTGCACTAG                | <i>rstR<sup>ZJ</sup></i>                            |
| RstAZJ-1 | TGATAAATCATACCGCCCTGA             | <i>rstA</i> of pre-CTX <sup>ZJ</sup> Φ              |
| RstRN-1  | GTAATAAGGAAGCTCGATTA              | <i>rstR<sup>ZJ</sup></i> of pre-CTX <sup>ZJ</sup> Φ |
| RstRN-2  | GCATTCCCAAGATACCATAG              |                                                     |
| RstAN-1  | CCACTGGTCGGGACGCATGTT             | <i>rstA</i> in pre-CTX <sup>ZJ</sup> Φ of           |
| RstAN-2  | TCAAATGGCTGGCCGATA                | VC06-18                                             |
| rstRZJ1  | CGGAATTCGGTAAAACTTTGCACTAG        | <i>rstR<sup>ZJ</sup></i> in pre-CTX <sup>ZJ</sup> Φ |
| rstRZJ2  | CGGAATTCGCGACGTAGCGTGCGGAG        |                                                     |
| rstAZJP1 | CGGAATTCATCCCCATGTTTGG            | <i>rstA</i> promoter region of                      |
| rstAZJP2 | CTTTCGAAGTCATGCACCAAAAACCTGTC     | pre-CTX <sup>ZJ</sup> Φ                             |
| RlucZJ1  | TTTTTGGTGCATGACTTCGAAAGTTTAT      | <i>Rluc</i>                                         |
| Rluc2    | CGGAATTCACTGCATTCTAGTTGTGGTTTGTCC |                                                     |
| Rluc1    | CGGAATTC ATGACTTCGAAAGTTTATG      | <i>Rluc</i>                                         |
| RS-F     | ACGCGTTCGACCCGTTGCCGATTTCATCAC    | <i>zot</i>                                          |
| RS-R     | CCGGAATTCGATTGCACAATGGGAGAGCC     | <i>gIII<sup>CTX</sup></i>                           |
| zotF1    | GATAAGAGAGGCGGCGGAG               | <i>zot</i>                                          |
| zotR1    | CGTGGGTGGTCAGGGTAAAC              |                                                     |
| ThyA1    | GCCGATTTGACCTACGATG               | <i>thyA</i>                                         |
| ThyA2    | ACGAATATAGCCGAGCAACTC             |                                                     |

32 **Table S2.** GenBank accession numbers

| GenBank      | Gene                                                                                                   | Strain                         |
|--------------|--------------------------------------------------------------------------------------------------------|--------------------------------|
| KP768424     | <i>rstR<sup>ZJ</sup>, rstR1<sup>ZJ</sup>, rstA, rstA1<sup>ZJ</sup>, rstB, rstB1<sup>ZJ</sup>, rstC</i> | V06-18                         |
| AF133307     | <i>rstR-4**</i>                                                                                        | SCE223                         |
| AF133309     | <i>rstR-4*</i>                                                                                         | SCE263                         |
| NC_010614    | <i>rstR1, rstA1, rstB1, rstC</i>                                                                       | <i>Vibrio tapetis</i> CECT4600 |
| AF055890     | <i>rstR<sup>class</sup>, rstA, partial rstB</i>                                                        | 569B                           |
| AF110029     | <i>rstR<sup>Calc</sup>, rstA, rstB</i>                                                                 | AS207                          |
| AF452586     | <i>rstR6</i>                                                                                           | 506-94                         |
| DQ288668     | <i>rstR-232, rstA, rstB</i>                                                                            | VCE232                         |
| AE003852     | <i>rstR<sup>ET</sup>, rstR1<sup>ET</sup>, rstA, rstA1, rstB, rstB1, rstC</i>                           | N16961                         |
| JMBO01000107 | helix-turn-helix family protein                                                                        | 234-93                         |
| AP014524     | <i>rstR1, rstA1, rstB1, rstC, rstR, rstA, rstB</i>                                                     | MS6                            |
| AF319656     | <i>rstR1/rstR-5, rstA1, rstB1, rstC</i>                                                                | SCE264                         |
| U83795       | <i>rstC</i>                                                                                            | E7946                          |
| EU860439     | <i>rstC</i>                                                                                            | VC44                           |
| AAKJ02000045 | <i>rstC</i>                                                                                            | V52                            |
| DS179738     | <i>rstC</i>                                                                                            | V51                            |
| ACVW01000013 | <i>rstC</i>                                                                                            | CIRS101                        |
| ADAK01000003 | <i>rstC</i>                                                                                            | INDRE 91/1                     |
| GQ466610     | <i>rstC</i>                                                                                            | IB1627                         |
| GQ466608     | <i>rstC</i>                                                                                            | IB1346                         |
| GQ485653     | <i>rstC</i>                                                                                            | E1781                          |
| GQ485651     | <i>rstC</i>                                                                                            | IB4642                         |
| GU942563     | <i>rstC</i>                                                                                            | VC106                          |
| HQ224500     | <i>rstC</i>                                                                                            | KMN002                         |
| GQ485654     | <i>rstC</i>                                                                                            | MG116926                       |
| GQ485652     | <i>rstC</i>                                                                                            | 01.07vp                        |
| GQ485650     | <i>rstC</i>                                                                                            | IB4322                         |

33

34
